# Supplementary material for: Epoxy Resins for Flooring Applications, an Optimal Host for Recycling Deactivated Cement Asbestos
Source: MDPI journal article supplement (doi:10.3390/polym15061410), 2023-03-12
Supplement: s1 [file s1]

Supplementary Information

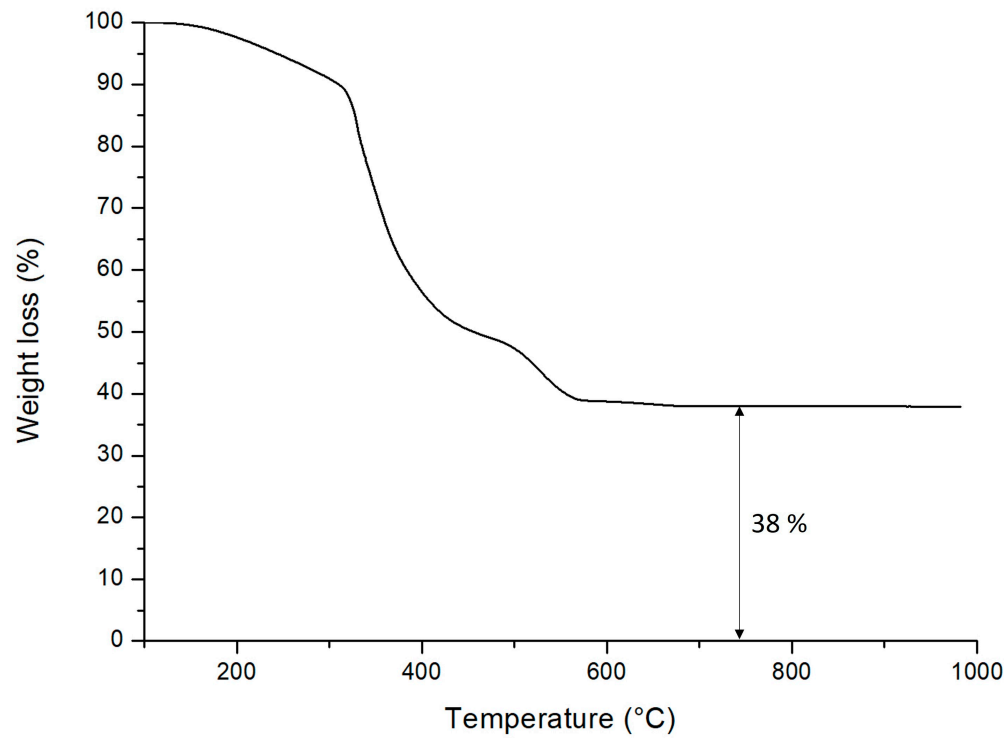

Figure SM1. TGA curve of sample PF0 revealing a content of barite of 38 wt%.

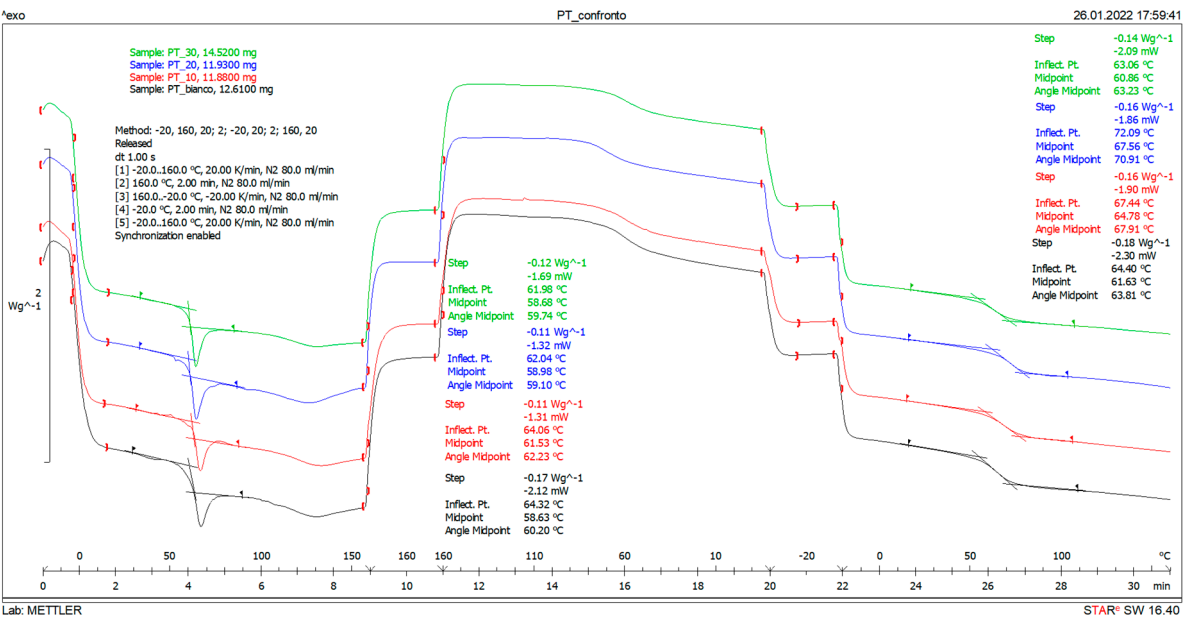

Figure SM2. DSC raw data of PT samples.

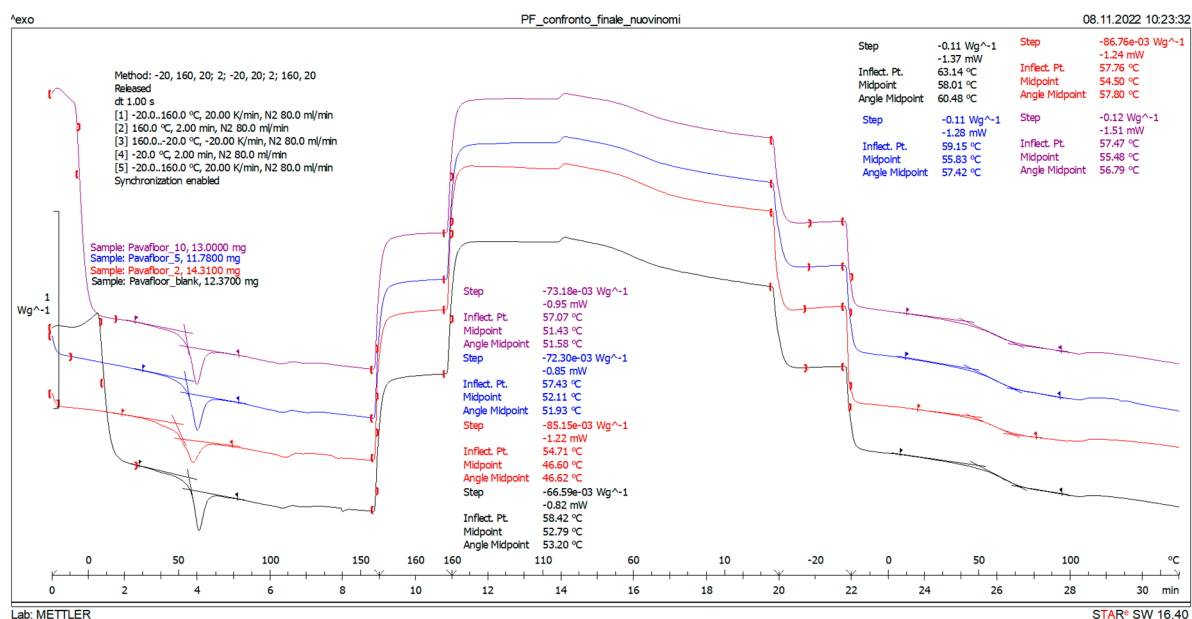

Figure SM3. DSC raw data of PF samples.

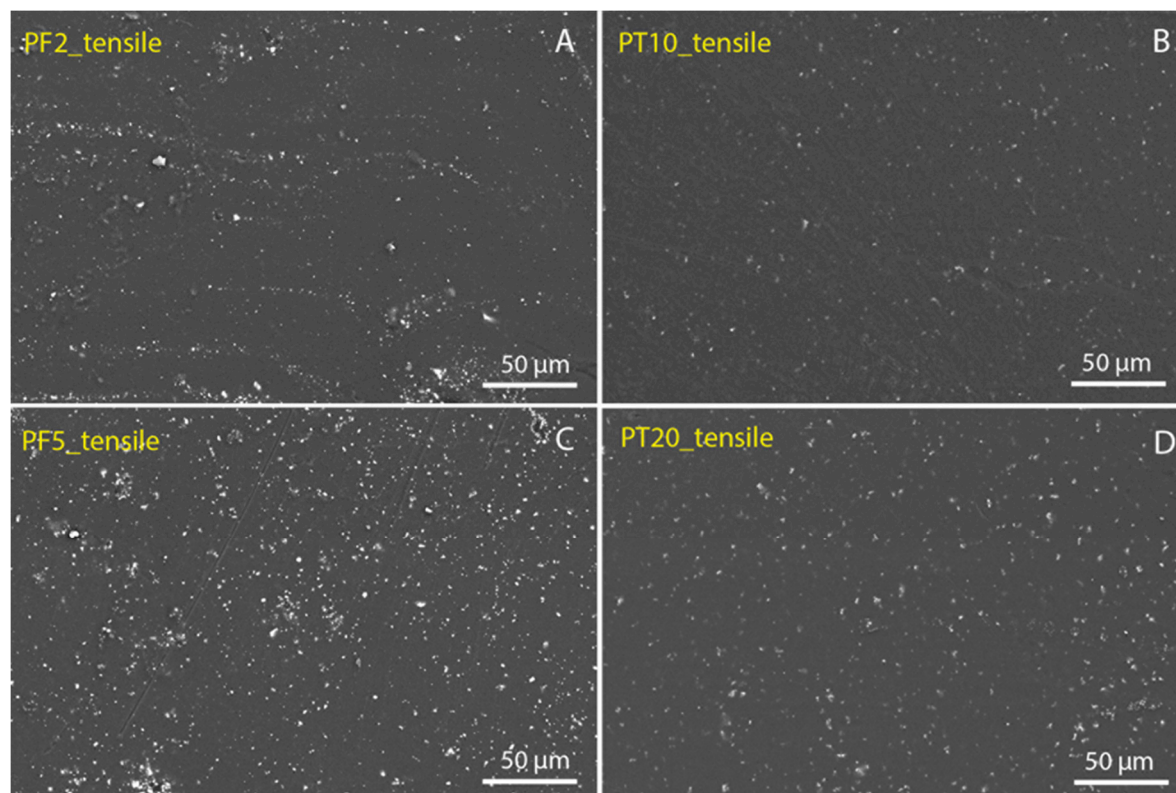

Figure SM4. SEM images showing the filler dispersion in samples PF (left) and PT (right).

**Table SM1.** Results of mechanical tests (compressive, tensile, and flexural strength) for the PF samples.

| Compressive strength |                      |                      |       | Tensile strength     |                      |       | Flexural strength    |                      |
|----------------------|----------------------|----------------------|-------|----------------------|----------------------|-------|----------------------|----------------------|
| PF0                  | E <sub>c</sub> (MPa) | σ <sub>c</sub> (MPa) | ε (%) | E <sub>t</sub> (MPa) | σ <sub>t</sub> (MPa) | ε (%) | σ <sub>F</sub> (MPa) | E <sub>f</sub> (MPa) |
| 1                    | 693.9                | 100.2                | 47.5  | 540.0                | 21.0                 | 5.0   | 44.7                 | 1481.6               |
| 2                    | 870.5                | 132.2                | 51.2  | 597.6                | 22.6                 | 5.3   | 38.4                 | 1406.6               |
| 3                    | 727.9                | 69.7                 | 47.1  | 684.6                | 21.2                 | 5.0   | 29.6                 | 875.9                |
| 4                    | 912.3                | 99.7                 | 48.3  | 634.1                | 21.5                 | 5.4   | 39.7                 | 1231.8               |
| 5                    | 991.4                | 102.4                | 48.4  | -                    | -                    | -     | 43.8                 | 1648.3               |
| Ave.                 | 839.2                | 100.9                | 48.5  | 614.1                | 21.6                 | 5.2   | 39.2                 | 1328.9               |
| St.dev.              | 125.5                | 22.1                 | 1.6   | 60.9                 | 0.7                  | 0.2   | 6.0                  | 294.1                |
| PF2                  |                      |                      |       |                      |                      |       |                      |                      |
| 1                    | 113.2                | 101.2                | 56.5  | 295.6                | 9.6                  | 40.2  | 20.3                 | 486.6                |
| 2                    | 167.9                | 129.0                | 59.1  | 282.4                | 10.3                 | 28.2  | 18.1                 | 440.0                |
| 3                    | 125.4                | 126.6                | 57.4  | 275.3                | 9.2                  | 31.3  | 17.2                 | 529.4                |
| 4                    | 168.3                | 85.4                 | 54.3  | 232.0                | 9.1                  | 35.8  | 18.0                 | 517.6                |
| 5                    | 142.2                | 121.2                | 56.8  | 194.5                | 7.9                  | 33.9  | 16.3                 | 450.2                |
| Ave.                 | 143.4                | 112.7                | 56.8  | 256.0                | 9.2                  | 33.9  | 18.0                 | 484.8                |
| St.dev.              | 24.8                 | 18.8                 | 1.7   | 41.8                 | 0.9                  | 4.5   | 1.5                  | 39.6                 |
| PF5                  |                      |                      |       |                      |                      |       |                      |                      |
| 1                    | 794.7                | 45.7                 | 34.3  | 493.8                | 12.0                 | 8.5   | 37.8                 | 1270.6               |
| 2                    | 881.9                | 92.6                 | 48.4  | 533.5                | 15.2                 | 5.3   | 30.9                 | 963.5                |
| 3                    | 638.1                | 103.9                | 49.6  | 490.6                | 14.4                 | 8.2   | 34.3                 | 1037.2               |
| 4                    | 667.5                | 48.1                 | 33.2  | 492.5                | 13.7                 | 8.2   | 35.7                 | 1274.2               |
| 5                    | 710.4                | 39.8                 | 29.3  | 746.5                | 19.0                 | 5.8   | 28.5                 | 824.4                |
| 6                    | 645.4                | 40.0                 | 30.4  | -                    | -                    | -     | -                    | -                    |
| 7                    | 669.7                | 34.4                 | 21.2  | -                    | -                    | -     | -                    | -                    |
| Ave.                 | 715.4                | 57.8                 | 35.2  | 551.4                | 14.8                 | 7.2   | 33.4                 | 1074.0               |
| St.dev.              | 90.6                 | 28.2                 | 10.3  | 110.5                | 2.6                  | 1.5   | 3.7                  | 196.6                |
| PF10                 |                      |                      |       |                      |                      |       |                      |                      |
| 1                    | 414.2                | 98.2                 | 46.2  | 466.2                | 12.1                 | 5.8   | 32.6                 | 1074.6               |
| 2                    | 822.0                | 62.8                 | 43.3  | 695.5                | 16.8                 | 7.4   | 24.0                 | 717.0                |
| 3                    | 455.7                | 80.4                 | 45.9  | 522.0                | 15.6                 | 4.5   | 25.5                 | 768.8                |
| 4                    | 530.3                | 53.8                 | 36.9  | 361.6                | 11.4                 | 5.8   | 31.7                 | 1185.8               |
| 5                    | 649.5                | 105.0                | 47.7  | 509.6                | 14.7                 | 4.6   | 36.9                 | 1274.5               |
| Ave.                 | 574.3                | 80.0                 | 44.0  | 511.0                | 14.1                 | 5.6   | 30.1                 | 1004.1               |
| St.dev.              | 164.8                | 22.0                 | 4.3   | 120.9                | 2.3                  | 1.2   | 5.3                  | 249.5                |

σ = strength; E = Young modulus; ε = strain/elongation; Ave. = average; St.dev. = standard deviation.

**Table SM2.** Results of mechanical tests (compressive, tensile, and flexural strengths) for the PT samples.

| PT0     | Compressive strength |                  |                   | Tensile strength |                  |                   | Flexural strength |             |
|---------|----------------------|------------------|-------------------|------------------|------------------|-------------------|-------------------|-------------|
|         | $E_c$ (MPa)          | $\sigma_c$ (MPa) | $\varepsilon$ (%) | $E_t$ (MPa)      | $\sigma_t$ (MPa) | $\varepsilon$ (%) | $\sigma_F$ (MPa)  | $E_f$ (MPa) |
| 1       | 1443.5               | 70.5             | 42.4              | 575.3            | 50.3             | 6.2               | 84.5              | 2468.9      |
| 2       | 1437.3               | 69.2             | 42.1              | 672.7            | 47.7             | 5.9               | 73.8              | 2072.8      |
| 3       | 1728.2               | 71.1             | 42.1              | 882.2            | 56.0             | 5.7               | 62.4              | 1537.3      |
| 4       | 1430.2               | 62.7             | 6.4               | 969.5            | 56.2             | 5.6               | 72.8              | 2145.8      |
| 5       | 1287.0               | 61.6             | 6.9               | -                | -                | -                 | 79.7              | 1942.1      |
| Ave.    | 1465.3               | 67.0             | 28.0              | 774.9            | 52.6             | 5.8               | 74.6              | 2033.4      |
| St.dev. | 160.8                | 4.5              | 19.5              | 182.3            | 4.3              | 0.3               | 8.3               | 338.5       |
| PT10    |                      |                  |                   |                  |                  |                   |                   |             |
| 1       | 1553.0               | 62.4             | 5.6               | 730.2            | 50.5             | 5.9               | 62.3              | 1516.9      |
| 2       | 1312.8               | 65.7             | 38.0              | 772.2            | 51.8             | 5.4               | 70.3              | 2121.3      |
| 3       | 1097.8               | 54.9             | 8.2               | 693.5            | 47.1             | 4.8               | 71.2              | 2010.8      |
| 4       | 988.5                | 63.4             | 37.7              | 832.8            | 53.7             | 4.6               | 65.9              | 2081.7      |
| 5       | -                    | -                | -                 | 731.9            | 54.0             | 4.6               | 58.5              | 1335.6      |
| Ave.    | 1238.0               | 61.6             | 22.4              | 752.1            | 51.4             | 5.1               | 65.6              | 1813.3      |
| St.dev. | 249.5                | 4.7              | 17.9              | 53.0             | 2.8              | 0.6               | 5.4               | 361.2       |
| PT20    |                      |                  |                   |                  |                  |                   |                   |             |
| 1       | 1369.1               | 81.8             | 49.2              | 922.7            | 38.5             | 3.7               | 61.5              | 2007.8      |
| 2       | 1712.6               | 69.4             | 5.9               | 870.6            | 43.1             | 3.8               | 66.7              | 2361.9      |
| 3       | 1498.7               | 88.5             | 51.8              | 848.3            | 40.5             | 3.5               | 58.4              | 2093.1      |
| 4       | 1373.9               | 94.8             | 46.2              | 1015.5           | 44.5             | 4.6               | 66.8              | 2386.7      |
| 5       | -                    | -                | -                 | 791.1            | 47.5             | 4.1               | -                 | -           |
| Ave.    | 1488.6               | 83.6             | 38.3              | 889.7            | 42.8             | 4.0               | 63.3              | 2212.3      |
| St.dev. | 160.9                | 10.9             | 21.7              | 84.7             | 3.5              | 0.4               | 4.1               | 190.5       |
| PT30    |                      |                  |                   |                  |                  |                   |                   |             |
| 1       | 1244.2               | 73.7             | 48.9              | 738.1            | 40.1             | 4.0               | 51.7              | 1754.6      |
| 2       | 1061.9               | 58.0             | 31.7              | 965.8            | 36.6             | 3.4               | 47.7              | 1664.4      |
| 3       | 1685.7               | 68.0             | 39.8              | 857.0            | 48.1             | 4.3               | 43.2              | 1420.7      |
| 4       | 1452.4               | 68.3             | 20.4              | 843.2            | 40.3             | 3.6               | 59.2              | 2042.3      |
| 5       | -                    | -                | -                 | 795.4            | 45.9             | 4.2               | 47.7              | 1661.3      |
| Ave.    | 1361.0               | 67.0             | 35.2              | 839.9            | 42.2             | 3.9               | 49.9              | 1708.7      |
| St.dev. | 268.9                | 6.6              | 12.1              | 84.4             | 4.7              | 0.4               | 6.0               | 223.9       |

$\sigma$  = strength;  $E$  = Young modulus;  $\varepsilon$  = strain/elongation; Ave. = average; St.dev. = standard deviation.

**Table SM3.** Variation of the Shore hardness on resin flooring samples with increasing DCAP content for the PF (left) and PT (right) samples.

| #       | PF0  | PF2  | PF5  | PF10 | PT0  | PT10 | PT20 | PT30 |
|---------|------|------|------|------|------|------|------|------|
| 1       | 82.0 | 70.3 | 83.3 | 73.9 | 81.7 | 50.0 | 85.8 | 73.7 |
| 2       | 83.1 | 57.5 | 66.3 | 75.8 | 72.7 | 87.4 | 83.9 | 82.9 |
| 3       | 63.9 | 69.1 | 83.9 | 75.7 | 47.3 | 82.0 | 86.2 | 88.6 |
| 4       | 87.2 | 67.8 | 80.0 | 77.9 | 85.6 | 78.1 | 85.5 | 87.9 |
| 5       | 80.8 | 56.8 | 84.6 | 73.4 | 43.9 | 74.7 | 78.8 | 87.6 |
| 6       | 78.1 | 67.7 | 75.0 | 78.1 | 44.4 | 58.1 | 81.5 | 87.1 |
| 7       | 79.5 | 65.2 | 86.3 | 80.5 | 50.4 | 83.9 | 63.6 | 88.1 |
| 8       | 77.0 | 66.3 | 58.6 | 73.6 | 69.0 | 80.3 | 85.6 | 83.4 |
| 9       | 84.2 | 70.8 | 77.5 | 77.2 | 48.7 | 60.5 | 85.3 | 81.7 |
| 10      | 47.7 | 68.8 | 86.6 | 77.8 | 81.5 | 68.5 | 83.6 | 86.9 |
| Ave.    | 76.4 | 66.0 | 78.2 | 76.4 | 62.5 | 72.4 | 82.0 | 84.8 |
| St.dev. | 11.9 | 5.0  | 9.3  | 2.3  | 17.2 | 12.5 | 6.9  | 4.6  |

Ave. = average; St.dev. = standard deviation.
